# Supplementary material for: Access to highly specialized growth substrates and production of epithelial immunomodulatory metabolites determine survival of Haemophilus influenzae in human airway epithelial cells
Source: PubMed Central journal article supplement (PMC8794153; doi:10.1371/journal.ppat.1010209), 2022-01-27
Supplement: ppat.1010209.s001.pdf [file ppat.1010209.s001.pdf]

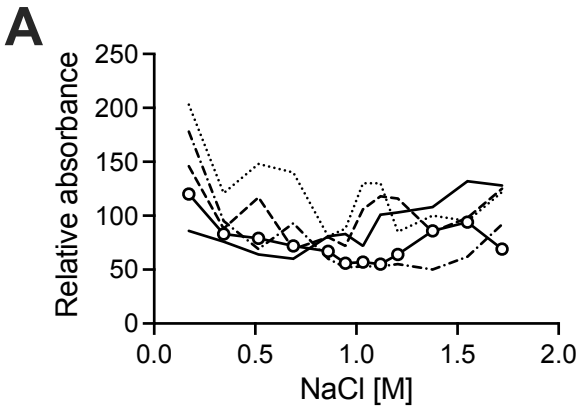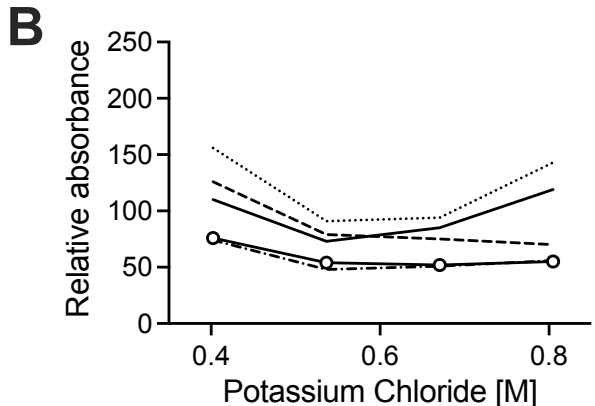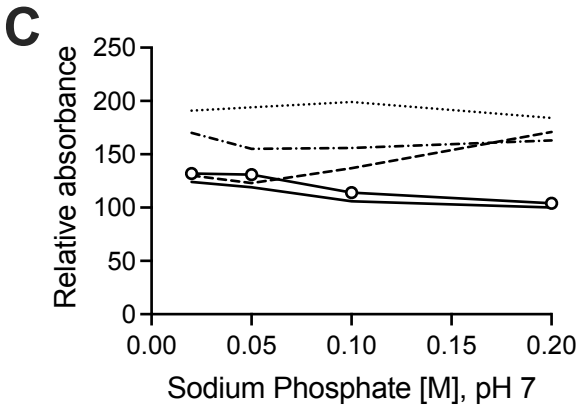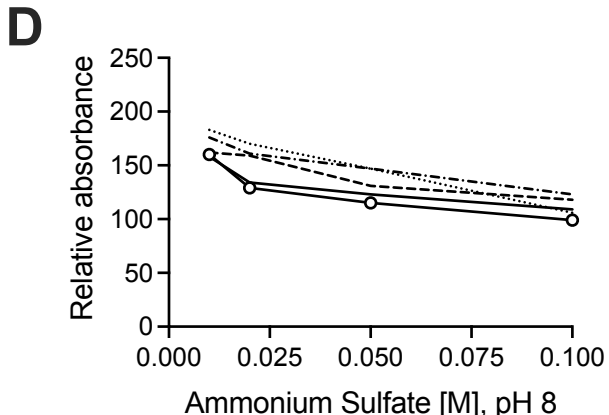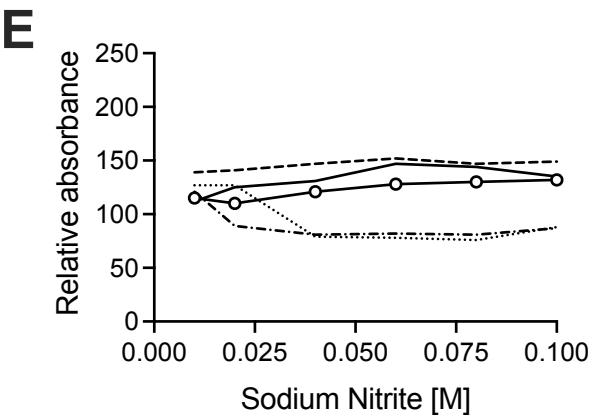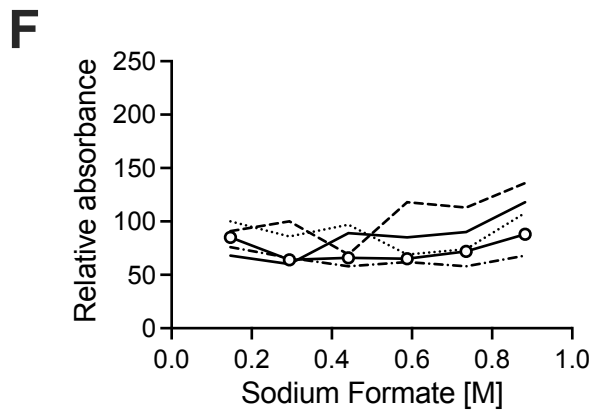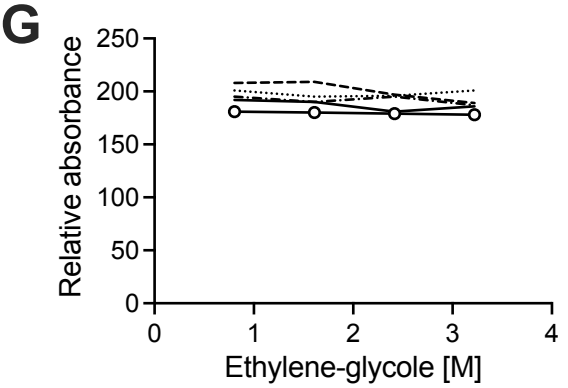

- Hi2019
- 86-028NP
- .- C188
- ..... R2866
- R353
