# Supplementary material for: Access to highly specialized growth substrates and production of epithelial immunomodulatory metabolites determine survival of Haemophilus influenzae in human airway epithelial cells
Source: PubMed Central journal article supplement (PMC8794153; doi:10.1371/journal.ppat.1010209), 2022-01-27
Supplement: ppat.1010209.s007.pdf [file ppat.1010209.s007.pdf]

| compound                        | MEM Medium components | Concentration (mM) |             |                  |             |
|---------------------------------|-----------------------|--------------------|-------------|------------------|-------------|
|                                 |                       | 16HBE14            |             | 16HBE14 + Hi2019 |             |
|                                 |                       | 4h                 | 24h         | 4h               | 24h         |
| <b>major components</b>         |                       |                    |             |                  |             |
| Glucose                         | 5.556                 | 5.080±0.076        | 3.552±0.350 | 3.995±0.149      | 1.338±0.201 |
| Lactate                         | -                     | 1.596±0.225        | 3.356±0.609 | 0.528±0.112      | 1.138±0.066 |
| Ethanol                         | -                     | 1.733±0.250        | 3.521±0.562 | 3.504±0.486      | 3.084±0.143 |
| Alanine                         | -                     | 0.180±0.031        | 0.590±0.143 | 0.363±0.095      | 1.772±0.083 |
| Acetate                         | -                     | 0.109±0.006        | 0.107±0.008 | 1.162±0.069      | 7.253±0.196 |
| Succinate                       | -                     | 0.063±0.004        | 0.063±0.012 | 0.101±0.008      | 0.362±0.073 |
| Formate                         | -                     | 0.043±0.001        | 0.048±0.003 | 0.058±0.006      | 0.119±0.072 |
| pyruvate                        | -                     | 0.032±0.006        | 0.060±0.010 | 0.523±0.039      | 0.032±0.013 |
| <b>other compounds detected</b> |                       |                    |             |                  |             |
| Arginine                        | 0.597                 | 0.340±0.055        | 0.358±0.040 | 0.352±0.021      | 0.406±0.029 |
| (Cystine)                       | 0.100                 | 0.095±0.012        | 0.126±0.052 | 0.186±0.009      | 0.153±0.084 |
| Glutamate                       | -                     | 0.062±0.023        | 0.069±0.024 | 0.033±0.007      | 0.092±0.038 |
| Glutamine                       | -                     | 0.146±0.021        | 0.414±0.421 | 0.217±0.010      | 0.939±0.683 |
| (Histidine)                     | 0.200                 | 0.182±0.010        | 0.089±0.074 | 0.160±0.006      | 0.143±0.066 |
| Isoleucine                      | 0.397                 | 0.270±0.088        | 0.300±0.060 | 0.288±0.034      | 0.332±0.018 |
| Leucine                         | 0.397                 | 0.316±0.030        | 0.275±0.047 | 0.291±0.043      | 0.331±0.014 |
| (Lysine)                        | 0.399                 | 0.212±0.009        | 0.205±0.044 | 0.219±0.015      | 0.225±0.039 |
| Methionine                      | 0.101                 | 0.081±0.004        | 0.075±0.013 | 0.087±0.005      | 0.077±0.018 |
| Phenylalanine                   | 0.194                 | 0.156±0.003        | 0.146±0.027 | 0.147±0.009      | 0.146±0.009 |
| Threonine                       | 0.403                 | 0.170±0.014        | 0.168±0.029 | 0.171±0.006      | 0.186±0.005 |
| Tryptophan                      | 0.049                 | 0.031±0.002        | 0.031±0.007 | 0.030±0.004      | 0.010±0.001 |
| Tyrosine                        | 0.199                 | 0.160±0.029        | 0.134±0.037 | 0.166±0.028      | 0.126±0.020 |
| Valine                          | 0.393                 | 0.285±0.019        | 0.263±0.042 | 0.281±0.025      | 0.332±0.017 |
| Choline Chloride                | 0.007                 | 0.010±0.003        | 0.016±0.007 | 0.018±0.003      | 0.017±0.004 |
| Niacinamide                     | 0.008                 | 0.006±0.000        | 0.005±0.076 | 0.006±0.001      | 0.003±0.003 |
|                                 |                       |                    |             |                  |             |
| Citrate                         | -                     | 0.020±0.000        | 0.018±0.002 | 0.000±0.000      | 0.000±0.000 |
| Glycerol                        | -                     | 3.410±4.911        | 0.667±0.206 | 6.556±5.004      | 2.083±2.407 |
| Creatine                        | -                     | 0.015±0.004        | 0.015±0.002 | 0.017±0.002      | 0.069±0.092 |
| Creatine phosphate              | -                     | 0.019±0.001        | 0.013±0.004 | 0.009±0.000      | 0.016±0.006 |
| Creatinine                      | -                     | 0.014±0.005        | 0.004±0.000 | 0.023±0.001      | 0.015±0.009 |
| Hypoxanthine                    | -                     | 0.007±0.002        | 0.004±0.002 | 0.004±0.001      | 0.001±0.000 |
| Inosine                         | -                     | 0.002±0.001        | 0.002±0.000 | 0.001±0.000      | 0.001±0.000 |
