# Supplementary material for: Access to highly specialized growth substrates and production of epithelial immunomodulatory metabolites determine survival of Haemophilus influenzae in human airway epithelial cells
Source: PubMed Central journal article supplement (PMC8794153; doi:10.1371/journal.ppat.1010209), 2022-01-27
Supplement: ppat.1010209.s008.pdf [file ppat.1010209.s008.pdf]

| <b>Hi strains</b> |    | <b>WT</b>     | <b><i>ΔlldD</i></b> | <b><i>Δlld</i></b> | <b><i>ΔldhA</i></b> |
|-------------------|----|---------------|---------------------|--------------------|---------------------|
| <b>Glc</b>        | AE | 0.507 ± 0.017 | 0.486 ± 0.017       | 0.541 ± 0.024      | 0.520 ± 0.030       |
|                   | MA | 0.426 ± 0.003 | 0.349 ± 0.011       | 0.385 ± 0.009      | 0.433 ± 0.009       |
|                   | AN | 0.321 ± 0.026 | 0.204 ± 0.075       | 0.131 ± 0.022      | 0.308 ± 0.047       |
| <b>DL-lac.</b>    | AE | 0.584 ± 0.040 | 0±0                 | 0.555 ± 0.009      | 0.596 ± 0.056       |
|                   | MA | 0.583 ± 0.039 | 0±0                 | 0.576 ± 0.009      | 0.600 ± 0.041       |
|                   | AN | 0.193 ± 0.008 | 0±0                 | 0.274 ± 0.009      | 0.248 ± 0.014       |
| <b>L-lac.</b>     | AE | 0.531 ± 0.002 | 0±0                 | 0.395 ± 0.078      | 0.510 ± 0.050       |
|                   | MA | 0.374 ± 0.059 | 0±0                 | 0.406 ± 0.027      | 0.255 ± 0.027       |
|                   | AN | 0.204 ± 0.024 | 0±0                 | 0.209 ± 0.015      | 0.265 ± 0.003       |
