# Supplementary material for: Access to highly specialized growth substrates and production of epithelial immunomodulatory metabolites determine survival of Haemophilus influenzae in human airway epithelial cells
Source: PubMed Central journal article supplement (PMC8794153; doi:10.1371/journal.ppat.1010209), 2022-01-27
Supplement: ppat.1010209.s010.pdf [file ppat.1010209.s010.pdf]

| <b>Enzyme</b> | <b>Substrate</b> | <b><math>k_{Mapp}</math> (mM)</b> | <b><math>V_{max\_app}</math> [U/mg]</b> |
|---------------|------------------|-----------------------------------|-----------------------------------------|
| <b>LldD</b>   | L-lactate        | 0.13±0.02 (MTT)                   | 0.28±0.01 (MTT)                         |
|               |                  | 0.30±0.03 (DCPIP)                 | 0.34±0.08 (DCPIP)                       |
| <b>Dld</b>    | D-lactate        | 9.74±1.17 (MTT)                   | 0.27±0.01 (MTT)                         |
|               |                  | 0.82±0.08 (DCPIP)                 | 0.037±0.001 (DCPIP)                     |
| <b>LdhA</b>   | pyruvate         | 3.38±0.84                         | 1.41±0.08                               |
|               | NADH             | 0.055±0.003                       | 1.65±0.04                               |
