# Supplementary material for: Access to highly specialized growth substrates and production of epithelial immunomodulatory metabolites determine survival of Haemophilus influenzae in human airway epithelial cells
Source: PubMed Central journal article supplement (PMC8794153; doi:10.1371/journal.ppat.1010209), 2022-01-27
Supplement: ppat.1010209.s011.pdf [file ppat.1010209.s011.pdf]

|                          | WT     | $\Delta lldD$ | $\Delta dld$ | $\Delta ldhA$ |
|--------------------------|--------|---------------|--------------|---------------|
| <b><u>substrates</u></b> |        |               |              |               |
| Glucose                  | 3.704  | 0.365         | 0.829        | 3.262         |
| Inosine                  | 2.232  | 1.979         | 2.149        | 2.021         |
| Pyruvate                 | 0.000  | 0.000         | 0.000        | 0.000         |
| <b><u>products</u></b>   |        |               |              |               |
| Lactate                  | 0.088  | 0.059         | 0.110        | 0.081         |
| Acetate                  | 11.997 | <b>9.381</b>  | 11.670       | 11.335        |
| Succinate                | 12.448 | <b>9.143</b>  | 12.215       | 11.586        |
| Formate                  | 4.780  | <b>2.726</b>  | 4.321        | 4.452         |
| Hypoxanthine             | 4.275  | 4.115         | 4.478        | 3.987         |
| Fumarate                 | 0.054  | 0.016         | 0.039        | 0.051         |
