# Supplementary material for: Access to highly specialized growth substrates and production of epithelial immunomodulatory metabolites determine survival of Haemophilus influenzae in human airway epithelial cells
Source: PubMed Central journal article supplement (PMC8794153; doi:10.1371/journal.ppat.1010209), 2022-01-27
Supplement: ppat.1010209.s012.pdf [file ppat.1010209.s012.pdf]

**Table S7** – Bacterial strains and plasmids used in this study.

| <b>Strain</b>                                           | <b>Description</b>                                                                                                                                                                                                                                                | <b>Reference or Source</b> |
|---------------------------------------------------------|-------------------------------------------------------------------------------------------------------------------------------------------------------------------------------------------------------------------------------------------------------------------|----------------------------|
| <i>Escherichia coli</i> DH5 $\alpha$                    | F <sup>-</sup> $\phi$ 80 <i>lacZ</i> $\Delta$ M15 $\Delta$ ( <i>lacZYA-argF</i> )U169 <i>recA1 endA1 hsdR17</i> (r <sub>K</sub> <sup>-</sup> , m <sub>K</sub> <sup>+</sup> ) <i>phoA supE44</i> $\lambda$ <sup>-</sup> <i>thi-1 gyrA96 relA1</i> , cloning strain | Life Technologies          |
| <i>Haemophilus influenzae</i> 2019 (Hi2019 WT)          | Clinical isolate from a chronic obstructive pulmonary disease patient.<br>Sequence type 321                                                                                                                                                                       | Campagnari, Gupta (1)      |
| <i>Haemophilus influenzae</i> 86-028NP                  | Clinical isolate from a patient with otitis media.<br>Sequence type 33                                                                                                                                                                                            | Harrison, Dyer (2)         |
| <i>Haemophilus influenzae</i> C188                      | Clinical isolate from blood.<br>Sequence type 269                                                                                                                                                                                                                 | Kappler, Dhouib (3)        |
| <i>Haemophilus influenzae</i> R2866                     | Clinical isolate from the blood of a patient with otitis media.<br>Sequence type 99                                                                                                                                                                               | Nizet, Colina (4)          |
| <i>Haemophilus influenzae</i> R535                      | Clinical isolate from sputum.<br>Sequence type: unknown                                                                                                                                                                                                           | Kappler, Dhouib (3)        |
| Hi2019 $\Delta$ <i>lldD</i>                             | Hi2019 WT with <i>lldD</i> gene disrupted by the insertion of a kanamycin antibiotic resistance cassette ( <i>lldD::kan</i> )                                                                                                                                     | This study                 |
| Hi2019 $\Delta$ <i>dld</i>                              | Hi2019 WT with <i>dld</i> gene disrupted by the insertion of a kanamycin antibiotic resistance cassette ( <i>dld::kan</i> )                                                                                                                                       | This study                 |
| Hi2019 $\Delta$ <i>ldhA</i>                             | Hi2019 WT with <i>ldhA</i> gene disrupted by the insertion of a kanamycin antibiotic resistance cassette ( <i>ldhA::kan</i> )                                                                                                                                     | This study                 |
| Hi2019 $\Delta$ <i>lldD</i> <sup><i>lldD</i>_comp</sup> | Hi2019 $\Delta$ <i>lldD</i> containing a functional copy of <i>lldD</i> ( $\Delta$ <i>lldD::lldD</i> )                                                                                                                                                            | This study                 |
| Hi2019 $\Delta$ <i>dld</i> <sup><i>dld</i>_comp</sup>   | Hi2019 $\Delta$ <i>dld</i> containing a functional copy of <i>dld</i> ( $\Delta$ <i>dld::dld</i> )                                                                                                                                                                | This study                 |
| Hi2019 $\Delta$ <i>ldhA</i> <sup><i>ldhA</i>_comp</sup> | Hi2019 $\Delta$ <i>ldhA</i> containing a functional copy of <i>ldhA</i> ( $\Delta$ <i>ldhA::ldhA</i> )                                                                                                                                                            | This study                 |
| Hi2019 $\Delta$ <i>IMPDH</i>                            | Hi2019 WT with <i>guaB</i> gene disrupted by the insertion of a kanamycin antibiotic resistance cassette ( <i>guaB::kan</i> )                                                                                                                                     | This study                 |
|                                                         |                                                                                                                                                                                                                                                                   |                            |
| <b>Plasmid</b>                                          | <b>Description</b>                                                                                                                                                                                                                                                | <b>Reference or Source</b> |

|                              |                                                                                                                                   |                       |
|------------------------------|-----------------------------------------------------------------------------------------------------------------------------------|-----------------------|
| pUC4K                        | Cloning vector used to isolate the kanamycin resistance cassette. Vector also contains ampicillin resistance cassette.            | [5]                   |
| pGEM-T Easy                  | Cloning vector                                                                                                                    | Promega               |
| pGEM-Hi- <i>lldD</i>         | pGEM-T Easy derivative containing a 1000bp DNA fragment carrying the <i>lldD</i> gene and flanking regions                        | This study            |
| pGEM-Hi- <i>lldD</i> ::kan   | pGEM-Hi- <i>lldD</i> with the <i>lldD</i> gene disrupted by a kanamycin antibiotic resistance cassette                            | This study            |
| pBluescript II SK+           | Cloning vector                                                                                                                    | Stratagene            |
| pBlue-Hi- <i>dld</i>         | pBluescript derivative containing a 3098bp DNA fragment carrying the <i>dld</i> gene and flanking regions                         | This study            |
| pBlue-Hi- <i>dld</i> ::kan   | pBlue-Hi- <i>dld</i> with <i>dld</i> gene disrupted by a kanamycin antibiotic resistance cassette                                 | This study            |
| pBlue-Hi- <i>ldhA</i>        | pBluescript derivative containing a 2429bp DNA fragment carrying the <i>ldhA</i> gene and flanking regions                        | This study            |
| pBlue-Hi- <i>ldhA</i> ::kan  | pBlue-Hi- <i>ldhA</i> with <i>ldhA</i> gene disrupted by a kanamycin antibiotic resistance cassette                               | This study            |
| pBlue-Hi- <i>IMPDH</i>       | pBluescript derivative containing a 1880bp DNA fragment carrying the <i>guaB</i> gene and flanking regions                        | This study            |
| pBlue-Hi- <i>IMPDH</i> ::kan | pBlue-Hi- <i>IMPDH</i> with <i>guaB</i> gene disrupted by a kanamycin antibiotic resistance cassette                              | This study            |
| p601.1-sp2                   | Cloning vector containing Hi2019 601.1 pseudogene fragments flanking the insertion region and a spectinomycin resistance cassette | Johnston, Zaleski (6) |
| p601-Hi- <i>lldD</i>         | p601.1-sp2 derivative containing a 1200bp DNA fragment carrying a functional copy of the <i>lldD</i> gene region                  | This study            |
| p601-Hi- <i>dld</i>          | p601.1-sp2 derivative containing a 2549bp DNA fragment carrying a functional copy of the <i>dld</i> gene region                   | This study            |
| p601-Hi- <i>ldhA</i>         | p601.1-sp2 derivative containing a 2208bp DNA fragment carrying a functional copy of the <i>ldhA</i> gene region                  | This study            |

## References

1. Campagnari AA, Gupta MR, Dudas KC, Murphy TF, Apicella MA. Antigenic diversity of lipooligosaccharides of nontypable *Haemophilus influenzae*. *Infect Immun*. 1987;55(4):882-7. PubMed PMID: 3549563; PubMed Central PMCID: PMCPMC260433.
2. Harrison A, Dyer DW, Gillaspay A, Ray WC, Mungur R, Carson MB, et al. Genomic sequence of an otitis media isolate of nontypeable *Haemophilus influenzae*: comparative study with *H. influenzae* serotype d, strain KW20. *J Bacteriol*. 2005;187(13):4627-36. doi: 10.1128/JB.187.13.4627-4636.2005. PubMed PMID: 15968074.
3. Kappler U, Dhouib R, Nair RP, McEwan AG. Draft genome sequences of three nontypeable strains of *Haemophilus influenzae*, C188, R535, and 1200, isolated from different types of disease. *Genome Announc*. 2017;5(12):e00035-17. doi: 10.1128/genomeA.00035-17. PubMed PMID: 28336588.
4. Nizet V, Colina KF, Almquist JR, Rubens CE, Smith AL. A virulent nonencapsulated *Haemophilus influenzae*. *J Infect Dis*. 1996;173(1):180-6. doi: 10.1093/infdis/173.1.180.
5. Vieira J, Messing J. The pUC plasmids, an M13mp7-derived system for insertion mutagenesis and sequencing with synthetic universal primers. *Gene*. 1982;19(3):259-68. doi: [https://doi.org/10.1016/0378-1119\(82\)90015-4](https://doi.org/10.1016/0378-1119(82)90015-4).
6. Johnston JW, Zaleski A, Allen S, Mootz JM, Armbruster D, Gibson BW, et al. Regulation of sialic acid transport and catabolism in *Haemophilus influenzae*. *Mol Microbiol*. 2007;66(1):26-39. Epub 2007/09/21. doi: 10.1111/j.1365-2958.2007.05890.x. PubMed PMID: 17880422
