# Supplementary material for: Access to highly specialized growth substrates and production of epithelial immunomodulatory metabolites determine survival of Haemophilus influenzae in human airway epithelial cells
Source: PubMed Central journal article supplement (PMC8794153; doi:10.1371/journal.ppat.1010209), 2022-01-27
Supplement: ppat.1010209.s013.pdf [file ppat.1010209.s013.pdf]

| <b>Composition and Preparation of 12x PM Additive Solutions</b>                |                            |                                   |                                                       |                  |            |            |             |
|--------------------------------------------------------------------------------|----------------------------|-----------------------------------|-------------------------------------------------------|------------------|------------|------------|-------------|
| <b>Ingredients</b>                                                             | <b>Stock Conc.</b>         | <b>Conc. in PM Additive (12x)</b> | <b>Vol. of solutions required for each plate type</b> |                  |            |            |             |
|                                                                                |                            |                                   | <b>PM1,2</b>                                          | <b>PM3,6,7,8</b> | <b>PM4</b> | <b>PM5</b> | <b>PM9+</b> |
| Tricarballic acid (pH7.1)                                                      | 800mM                      | 240mM                             | -                                                     | 6ml              | 6ml        | 6ml        | -           |
| MgCl <sub>2</sub> , 6H <sub>2</sub> O<br>CaCl <sub>2</sub> , 2H <sub>2</sub> O | 240mM<br>120mM             | 24mM<br>12mM                      | 2ml                                                   | 2ml              | 2ml        | 2ml        | 2ml         |
| L-arginine, HCl<br>L-glutamic acid                                             | 3mM<br>6mM                 | 300µM<br>600µM                    | 2ml                                                   | -                | 2ml        | -          | -           |
| b-NAD, Na<br>hypoxanthine<br>uracil<br>L-cystine (pH8.5)                       | 0.2mM<br>1mM<br>1mM<br>1mM | 60µM<br>300µM<br>300µM<br>300µM   | 6ml                                                   | 6ml              | -          | -          | -           |
| Yeast extract                                                                  | 0.6%                       | 0.06%                             | 2ml                                                   | 2ml              | 2ml        | -          | 2ml         |
| Tween 80                                                                       | 0.6%                       | 0.06%                             | 2ml                                                   | 2ml              | 2ml        | -          | 2ml         |
| D-glucose<br>Pyruvate, Na                                                      | 300mM<br>600mM             | 30mM<br>60mM                      | -                                                     | 2ml              | 2ml        | 2ml        | 2ml         |
| Sterile water                                                                  | N/A                        | 0 – 60ml                          | 6ml                                                   | -                | 4ml        | 10ml       | 12ml        |
| Total volume                                                                   |                            |                                   | 20ml                                                  | 20ml             | 20ml       | 20ml       | 20ml        |
| <b>Recipe for 1x PM Inoculating Fluids from Stock Solutions</b>                |                            |                                   |                                                       |                  |            |            |             |
| <b>PM Stock Solution</b>                                                       |                            |                                   | <b>PM1,2</b>                                          | <b>PM3,6,7,8</b> | <b>PM4</b> | <b>PM5</b> | <b>PM9+</b> |
| IF-0a GN/GP (1.2x)                                                             |                            |                                   | 20.0ml                                                | 40ml             | 10ml       | 10ml       | -           |
| IF-10b GN/GP (1.2x)                                                            |                            |                                   | -                                                     | -                | -          | -          | 110ml       |
| Dye Mix G (100x)                                                               |                            |                                   | 0.24ml                                                | 0.48ml           | 0.12ml     | 0.12ml     | 1.32ml      |
| PM additive (12x)                                                              |                            |                                   | 2.0ml                                                 | 4.0ml            | 1.0ml      | 1.0ml      | 11.0ml      |
| Hi cells (turbidity)                                                           |                            |                                   | 65%                                                   | 65%              | 65%        | 65%        | 65%         |
| Total volume (up to)                                                           |                            |                                   | 24.0ml                                                | 48.0ml           | 12.0ml     | 12.0ml     | 132.0ml     |
