# Supplementary material for: Access to highly specialized growth substrates and production of epithelial immunomodulatory metabolites determine survival of Haemophilus influenzae in human airway epithelial cells
Source: PubMed Central journal article supplement (PMC8794153; doi:10.1371/journal.ppat.1010209), 2022-01-27
Supplement: ppat.1010209.s014.pdf [file ppat.1010209.s014.pdf]

**Table S9** – Oligonucleotide primers used in this study

| Gene Target                                     | Primer Name                        | Primer Sequence (5' – 3')                |
|-------------------------------------------------|------------------------------------|------------------------------------------|
| <b>Hi mutant construction primers</b>           |                                    |                                          |
| KO- <i>lldD</i>                                 | Hi2019 <i>lldD</i> -KO-F           | AAAACGAAGGTCCCACACTTTAATC                |
|                                                 | Hi2019 <i>lldD</i> -KO-R           | AAAACACATTTTCCCGAAGAATCTC                |
| Comp- <i>lldD</i>                               | Hi2019 <i>lldD</i> -Comp-F         | AAAACCCGGG<br>AAACAAGTCAATCAACAAGTGCC    |
|                                                 | Hi2019 <i>lldD</i> -Comp-R         | AAAACCCGGG<br>GCTTTACATCTATGGGGATTTGA    |
| Upstream region of <i>ldhA</i>                  | Hi2019 <i>ldhA</i> -upF-PstI       | AAAACTGCAG<br>GATACTACGAACACCAAATTGTGC   |
|                                                 | Hi2019 <i>ldhA</i> -upR-BamHI      | AAAAGGATCC<br>CCATCGGTTTGATGATGACTC      |
| Downstream region of <i>ldhA</i>                | Hi2019 <i>ldhA</i> -downF-BamHI    | AAAAGGATCC<br>TATGTTCCGCCACCGCTTCAGG     |
|                                                 | Hi2019 <i>ldhA</i> -downR-SacII    | AAAACCGCGG<br>GCTCAAGCAGGCAATCGCAGTG     |
| Comp- <i>ldhA</i>                               | Hi2019 <i>ldhA</i> C-F-XmaI        | AAAACCCGGG<br>CCAAAACTAAGACGGCAAAA       |
|                                                 | Hi2019 <i>ldhA</i> C-R-XmaI        | AAAACCCGGG<br>CACTTTTTCCTTTGTGCCAAA      |
| Upstream region of <i>dld</i>                   | Hi2019 <i>dld</i> -upF-PstI        | AAAACTGCAG<br>ATGCGGACTGAATCATCTATGA     |
|                                                 | Hi2019 <i>dld</i> -upR-BglIII      | AAAAAGATCT<br>AGGCTCCCCTGCTCGTTTA        |
| Downstream region of <i>dld</i>                 | Hi2019 <i>dld</i> -downF-BglII     | AAAAAGATCT<br>TCATCAACTTGACGAACATAGT     |
|                                                 | Hi2019 <i>dld</i> -downR-SacI      | AAAAGAGCTC<br>CTAGAACCTACTCAATCAC        |
| Comp- <i>dld</i>                                | Hi2019 <i>dld</i> C-F-XmaI         | AAAACCCGGG<br>TGCGGTAAACATCAGATAATTTGC   |
|                                                 | Hi2019 <i>dld</i> C-R-XmaI         | AAAACCCGGG<br>CGGCTTGTTTCATCATTGGTTAA    |
| Upstream region of <i>IMPDH</i>                 | Hi2019 <i>IMPDH</i> -upF1-SacI     | AAAAGAGCTC<br>AATCTTGTCCATCAACGAGAATATC  |
|                                                 | Hi2019 <i>IMPDH</i> -downR1-BglIII | AAAAAGATCT<br>GGAAGTCTTTAACGGTAATCATAACC |
| Downstream region of <i>IMPDH</i>               | Hi2019 <i>IMPDH</i> -upF2-BglIII   | AAAAAGATCT<br>AAAAAGCAGAACAAAACCAAATG    |
|                                                 | Hi2019 <i>IMPDH</i> -downR2-SacII  | AAAACCGCGG<br>GATCAGGATTTTGTGATTGTGGATA  |
| Kan <sup>r</sup> cassette with flanking regions | pUC4K-PCR-F                        | GTTGGGTAACGCCAGGGTTTTCC                  |
|                                                 | pUC4K-PCR-R                        | TCCGGCTCGTATGTTGTGTGGAA                  |
| Kanamycin resistance cassette                   | pUC4K-F                            | GGAAAGCCACGTTGTGTCTC                     |
|                                                 | pUC4K-R                            | CTGAGGTCTGCCTCGTGAAG                     |
| <b>qPCR primers</b>                             |                                    |                                          |
| Human IL-6                                      | HS-QP-IL6_F                        | TGCCCCAGTACCCCCAGGAGAAGAT                |

|                    |                  |                           |
|--------------------|------------------|---------------------------|
|                    | HS-QP-IL6 R      | AGGGCTGAGATGCCGTCGAGGATGT |
| Human IL-8         | HS-QP-IL8 F      | GGTGCAGTTTTGCCAAGGAGTGCTA |
|                    | HS-QP-IL8 R      | GCGCAGTGTGGTCCACTCTCAATCA |
| Human IL-1 $\beta$ | HS-QP-IL1Beta_F2 | GCTCGCCAGTGAAATGATGGCTT   |
|                    | HS-QP-IL1Beta_R2 | CCATCCAGAGGGCAGAGGTCCA    |
| Human ACTB         | HS-QP-ACTB-F     | TGCTATCCCTGTACGCCTCTGGC   |
|                    | HS-QP-ACTB-R     | CCAGACGCAGGATGGCATGG      |
| Hi2019 <i>lctP</i> | Hi-QP-lctP F     | TACCAAACCCTTGGCCCCCTCGAT  |
|                    | Hi-QP-lctP R     | CAGGCGCAACAAATATTATGCGAAA |
| Hi2019 <i>ldhA</i> | HI-RT-ldhAF      | CTGGCGTTGCTGGGCAATGA      |
|                    | HI-RT-ldhAR      | TCTTGGCGTACGATCCTTTCA     |
| Hi2019 <i>lldD</i> | HI-RT-lldDF      | ATCATACGCCCAGAATGGGTG     |
|                    | HI-RT-lldDR      | ACGGTCGATATGCCTACTCCA     |
| Hi2019 <i>dld</i>  | HI-RT-dldF       | AGCGGAAAGGTGTCTAAACGA     |
|                    | HI-RT-dldR       | TCGTCAAGTTGATGAAGGCTC     |
| Hi2019 <i>guaB</i> | HI-QP-guaBF      | CAGGCGCAAGTGCTGTAAAAGTAGG |
|                    | HI-QP-guaBR      | CTTTTAATGCCGCCGCTGCA      |
| Hi2019 <i>deoD</i> | HI-QP-deoDF      | TCACGTCCATACGAACAGTGCCAC  |
|                    | HI-QP-deoDR      | TTATGGGGCACGGAATGGGG      |
| Hi2019 <i>gyrA</i> | HI-Qp-gyrAF      | GCGTGCATTACCTGACGTTTCGAG  |
|                    | HI-Qp-gyrAR      | CCCACAACACGCGCTGATTTTAC   |
| Mouse ACTB         | Mm-QP-ACTB-F     | CTGCGTCTGGACCTGGC         |
|                    | Mm-QP-ACTB-R     | CTTCTCTTTGATGTCACGCACGAT  |
| Mouse BIRC3        | Mm-QP-BIRC3-F    | CTGTGTCAGAAAGGAGTCTGGCT   |
|                    | Mm-QP-BIRC3-R    | CCATGGGACTGTCCCCTTG       |
| Mouse IL-1 $\beta$ | Mm-QP-IL1beta-F  | GCTTCAAATCTCGCAGCAGC      |
|                    | Mm-QP-IL1beta-R  | TCCTCATCCTGGAAGGTCCAC     |
| Mouse TNF $\alpha$ | Mm-QP-TNFalpha-F | TGAGCACTGAAAGCATGATCCG    |
|                    | Mm-QP-TNFalpha-R | CGATCAGGAAGGAGAAGAGGCTG   |
| Mouse IL-6         | Mm-QP-IL6-F      | GACTTCCATCCAGTTGCCTT      |
|                    | Mm-QP-IL6-R      | GGTATAGACAGGTCTGTTGG      |
